1 **RESEARCH ARTICLE**

2 **Sexual dimorphism and sex ratio bias in the dioecious willow *Salix purpurea* L.**

3 Fred E. Gouker<sup>1,2</sup>, Craig H. Carlson<sup>1</sup>, Junzhu Zou<sup>1,3</sup>, Luke Evans<sup>4,5</sup>, Chase R. Crowell<sup>6</sup>, Christine  
4 D. Smart<sup>6</sup>, Stephen P. DiFazio<sup>4</sup>, Lawrence B. Smart<sup>1,7</sup>

5

6 <sup>1</sup>Horticulture Section, School of Integrative Plant Science, Cornell University, Cornell AgriTech,  
7 Geneva, NY 14456, USA

8 <sup>2</sup>Current address: Floral and Nursery Plants Research Unit, U.S. National Arboretum, U.S.

9 Department of Agriculture, Agricultural Research Service, 10300 Baltimore Avenue, Beltsville,  
10 MD 20705

11 <sup>3</sup>Research Institute of Forestry, Chinese Academy of Forestry, Beijing, 100091, China

12 <sup>4</sup>Department of Biology, West Virginia University, Morgantown, WV 26506, USA

13 <sup>5</sup>Current address: Institute for Behavioral Genetics and Department of Ecology and Evolutionary  
14 Biology, University of Colorado, Boulder, CO 80304, USA

15 <sup>6</sup>Plant Pathology and Plant-Microbe Biology Section, School of Integrative Plant Science,  
16 Cornell University, Cornell AgriTech, Geneva, NY 14456, USA

17 <sup>7</sup>Author for correspondence (e-mail: lbs33@cornell.edu)

18

19 Manuscript received \_\_\_\_\_; revision accepted \_\_\_\_\_.

20

21 Running Title: *Salix* sexual dimorphism

22

1 **Abstract**

2 **Premise** Sexual dimorphism in dioecious plant species is often not obvious or is  
3 absent. Dioecious species populations also often exhibit deviations from expected sex ratios.  
4 Previous studies on members of the Salicaceae family have shown strong, partial, and no sexual  
5 dimorphism. Some studies have shown sex-biased ratios in several *Salix* spp., however, *S.*  
6 *purpurea* has never been examined for evidence of sexual dimorphism or for the presence of sex-  
7 ratio bias, and therefore a comprehensive phenotypic study is needed to fill this knowledge gap.

8 **Methods** This study examined a suite of morphological, phenological, physiological and wood  
9 composition traits from multi-environment and multi-year replicated field trials in a diversity  
10 panel of unrelated *S. purpurea* accessions and in full-sib F<sub>1</sub> and F<sub>2</sub> families produced through  
11 controlled cross pollinations to test for sexual dimorphism and sex ratio bias.

12 **Key Results** Significant evidence of sexual dimorphism was found in vegetative traits with  
13 greater means for many traits in male genotypes compared to females across three populations of  
14 *S. purpurea*, measured across multiple years that were highly predictive of biomass yield. Male  
15 plants exhibited greater nitrogen accumulation under fertilizer amendment as measured by SPAD  
16 in the diversity panel, and males showed greater susceptibility to fungal infection by  
17 *Melampsora* spp in the F<sub>2</sub> family. There were also consistent female-biased sex ratios in both the  
18 F<sub>1</sub> and F<sub>2</sub> families.

19 **Conclusions** These results provide the first evidence of sexual dimorphism in *S. purpurea* and  
20 also confirm the prevalence of female-biased sex ratios previously found in other *Salix* species.

21

- 1 **Keywords:** bioenergy; dioecy; *Melampsora*; nitrogen utilization; rust; *Salix purpurea*; sexual
- 2 dimorphism; sex ratio; willow; ZW sex determination
- 3

## 1 INTRODUCTION

2 Dioecy is found in 4-10% of all flowering plants and is therefore much less common than  
3 the co-sexual states of monoecy and hermaphroditism (reviewed by Renner, 2014; Charlesworth,  
4 2015; Sanderson *et al.*, 2019), even if one includes the instances of subdioecy, which has been  
5 reported in 32 species in 21 families (Ehlers and Bataillon, 2007). Dioecy in flowering plants is  
6 therefore thought to have evolved from an ancestral co-sexual state since the first flowering  
7 plants evolved, approximately 124.6 million years ago (MYA) (Sun *et al.*, 2002). Dioecy has  
8 evolved independently in many different plant families (reviewed by Renner, 2014) and even  
9 with different species in the same genus (Westergaard, 1958; Feng *et al.*, 2020). In some plant  
10 lineages, homomorphic or hetromorphic sex chromosomes have evolved (Ming *et al.*, 2007;  
11 Chen *et al.*, 2016, reviewed by Charlesworth, 2015). Recent studies have identified sex-  
12 determination regions (SDRs) in dioecious plants including grape (*Vitis*), papaya (*Carica*), and  
13 persimmon (*Diospyros*), (Fechter *et al.*, 2012; Wang *et al.*, 2012; Akagi *et al.*, 2014), in which  
14 the males are heterogametic, as well as other systems such as shrub willow (*Salix*) (Zhou *et al.*,  
15 2018), in which females are heterogametic.

16 Species of the Salicaceae family are almost all dioecious, including the woody perennial  
17 species in the genera *Populus* and *Salix*, which have clear morphological differences between  
18 staminate and pistillate catkins (Dickmann and Kuzovkina, 2008). Dioecy in the Salicaceae is  
19 thought to have evolved before the divergence of *Salix* and *Populus* approximately 65 MYA  
20 (Collinson, 1992; Tuskan *et al.*, 2006). Multiple cytological studies of *Populus* suggest that  
21 Salicaceae have homomorphic chromosomes (Peto, 1938; van Buijtenen and Einspahr, 1959),  
22 and genetic mapping studies indicate that both male and female heterogametic systems are  
23 present in *Populus* (Pakull *et al.*, 2009; Pakull *et al.*, 2011; Tuskan *et al.*, 2012; Kersten *et al.*,  
24 2014, Geraldès *et al.*, 2015). The sex determining locus has been mapped to two different

1 positions on Chr19 in different *Populus* species (Kersten *et al.*, 2014; Geraldès *et al.*, 2015). In  
2 willow species examined thus far, *S. viminalis*, *S. suchowensis*, and *S. purpurea*, females are the  
3 heterogametic sex (Semerikov *et al.*, 2003; Hou *et al.*, 2015; Pucholt *et al.*, 2015; Chen *et al.*,  
4 2016; Zhou *et al.*, 2018), in which the sex determination locus maps to Chr15 (Hou *et al.*, 2015;  
5 Zhou *et al.*, 2018) suggesting that the sex determination locus has translocated during recent  
6 evolution of *Populus* and *Salix*.

7         The relationship between sex chromosome evolution and sexual dimorphism and sex  
8 ratios are not yet fully understood. Primary sexual dimorphism refers to differences in the  
9 gametes produced, and in plants, this is expected to be controlled by sex-determining genes on a  
10 single sex chromosome, at least a portion of which is non-recombining (Charlesworth and  
11 Charlesworth, 1978). Secondary dimorphism includes other differences between males and  
12 females, such as morphology, physiology, and phenology (Charlesworth, 1999; Dawson and  
13 Geber, 1999; Delph, 1999), but in general sexual dimorphism in plants is less pronounced than in  
14 many animal systems, and evidence for dimorphism in secondary characteristics is scarce. Such  
15 differences may evolve when ecological and/or sexual selection lead to different fitness optima  
16 between sexes, and/or when physiological trade-offs occur due to the unequal energy costs of  
17 producing seeds versus pollen (Lewis, 1942; Arnold, 1994; Delph, 1999; Obeso, 2002). Females  
18 of woody dioecious plants typically produce less biomass than males, due to slower vegetative  
19 growth as a result of greater allocation to reproduction (Lewis, 1942; Lloyd and Webb, 1977;  
20 Obeso, 2002). Traits such as primary growth, production of secondary metabolites, and water use  
21 efficiency may be influenced by carbon resource allocation related to sex. Contrasting results  
22 have been found in *Salix*. In *S. sachalinensis* (syn *S. udensis*), no differences were detected in  
23 growth or mortality rates between males and females measured in a natural population over a  
24 three-year period (Ueno *et al.*, 2007). Conversely, it was reported that drought tolerance and gas

1 exchange rates differed between sexes in *S. glauca*, indicating dimorphism in physiological  
2 responses to abiotic stress with lower stomatal conductance ( $g_s$ ) and transpiration rates in males  
3 than in females when exposed to the same drought conditions (Dudley and Galen, 2007).  
4 However, the possibility of dimorphism has been studied for only a limited number of  
5 characteristics (Boecklen *et al.*, 1994; Boecklen *et al.*, 1990).

6 Another aspect of dimorphism in dioecious plants is sex ratio bias. Classical theories for  
7 sex ratios predict a 1:1 ratio if the expense per progeny is the same for both sexes (Fisher, 1930;  
8 Edwards, 2000). Theoretical models (reviewed by Delph, 1999; Obeso, 2002) suggest that sex  
9 ratio bias in natural populations could be due to differences in pollen and seed dispersal leading  
10 to different trade-offs between benefits and costs (Lloyd, 1982), other ecological factors (Barret  
11 *et al.*, 2010), or to pollen competition in species with sex chromosomes (certation), such that X-  
12 or Y-bearing pollen is slow growing, or genetic transmission bias due to distorters of the sex  
13 chromosome segregation in meiosis (Taylor, 1999). Since dioecious species are typically  
14 perennials (Field *et al.*, 2013a) and some can reproduce both clonally and sexually, the degree  
15 and frequency of flowering and clonal propagation can also both influence sex ratios. Several  
16 studies examining this in wild accessions of *Salix* have shown a female sex ratio bias (Barrett *et*  
17 *al.*, 2010). Male bias is commonly seen in trees and often associated with biotic pollen dispersal  
18 in contrast to female-biased ratios observed in shrubs and herbs that tend to be clonal, perennial  
19 species (Field *et al.*, 2013). Several studies of wild accessions of *Salix* have found sex ratio  
20 biases toward females (Ueno *et al.*, 2007; Che-Castaldo *et al.*, 2015), but male bias was  
21 demonstrated in a controlled cross experiment in *S. viminalis* (Alström-Rapaport *et al.*, 1997).  
22 Some studies of experimental populations (Mosseler and Zsuffa, 1989) have revealed greater  
23 variability of sex ratio bias than in natural populations (Myers-Smith and Hik, 2012), but sex

1 ratio bias in progeny of controlled crosses depends on the nature of the cross (inter- or  
2 intraspecific) as well as the ploidy levels of the parents.

3 The short generation time of *Salix* makes this genus suitable for studying sexual  
4 dimorphism and its genetic control. This study examined *S. purpurea* L. (purple osier willow), a  
5 naturalized species in North America and an important species in breeding shrub willow  
6 bioenergy crops in North America as it has been used in over 30% of all intra- and interspecific  
7 hybrids produced to date (Smart and Cameron, 2008). Critical traits to study for dimorphism  
8 include pest and disease resistance, drought tolerance, nitrogen and water use efficiency, and  
9 biomass yield.

10 This study describes the first investigation of sexual dimorphism in a *S. purpurea*  
11 diversity panel and F<sub>1</sub> and F<sub>2</sub> populations. The objectives were to (1) evaluate the phenotypic  
12 variability within naturally occurring and bred genotypes of *S. purpurea* (2) determine if there is  
13 sexual dimorphism of secondary sex characteristics among natural and bred populations and (3)  
14 test if observed sex ratios fit those expected based on a single locus sex determination system or  
15 if there is evidence for an multigenic control of sex ratio bias within the species.

16

## 17 **MATERIALS AND METHODS**

### 18 *Germplasm and field trials*

19 Three populations of *S. purpurea* L. were used in this study: a diversity panel of  
20 unrelated natural accessions, an F<sub>1</sub> family, and an F<sub>2</sub> family generated by crossing F<sub>1</sub> individuals.  
21 The diversity panel contained 78 genotypes of *S. purpurea* natural accessions (Lin *et al.*, 2009 ,  
22 Gouker *et al.*, 2019) (Appendix S1). In July 2012, all genotypes were hand planted using 20-cm  
23 cuttings in a common garden design at three experimental sites (Appendix S2): Cornell AgriTech  
24 in Geneva, NY the Cornell Lake Erie Research and Extension Lab (CLEREL) in Portland, NY;

1 and the West Virginia University (WVU) Agronomy Farm in Morgantown, WV. All sites were  
2 planted in a randomized complete block design with six replicates of four-plant plots at each  
3 location in single-row spacing with 1.82 m between rows and 0.40 m between plants within  
4 rows. Border rows containing either genotype 94006 or cultivar ‘Fish Creek’ were planted on the  
5 perimeter to avoid edge effects. At the end of the establishment year, all plants were coppiced  
6 and trials were measured in 2013 and 2014 and subsequently harvested and weighed in early  
7 2015. Prior to re-growth of the second rotation in 2015, 112 kg ha<sup>-1</sup> N-P-K fertilizer was applied  
8 to half of the replicates at each location to test for nitrogen utilization. Rust was surveyed at two  
9 locations at the end of the 2015 growing season.

10 The intraspecific F<sub>1</sub> *S. purpurea* family was generated from a cross between the female  
11 genotype 94006 and the male genotype 94001, which were accessions collected near Syracuse,  
12 NY and were also present in the diversity panel. Two F<sub>1</sub> siblings from this family were selected  
13 and crossed (‘Wolcott’ × ‘Fish Creek’) to generate the F<sub>2</sub> population. A total of 100 F<sub>1</sub> and 482  
14 F<sub>2</sub> progeny and their parents were hand planted using 20-cm cuttings at Cornell AgriTech in June  
15 2014 (Appendix S2) in a randomized complete block design with four replicate blocks of three-  
16 plant plots in the same single-row spacing described above (Carlson *et al.*, 2019). To avoid edge-  
17 effects, border rows containing 94006 and ‘Fish Creek’ were planted along the perimeter of the  
18 trial. At the end of the establishment year, all plants were coppiced, fertilized with 112 kg ha<sup>-1</sup>  
19 N, 67 kg ha<sup>-1</sup> P and K, and measurements were collected in 2015.

## 21 ***Phenotyping***

22 The diversity panel was evaluated for 26 biomass, morphological, phenological,  
23 physiological and wood composition traits measured as described (Appendix S3) across three  
24 sites in 2013 and 2014 and a subset of traits as well as rust incidence were measured in 2015.



1 The F<sub>1</sub> and F<sub>2</sub> populations were evaluated for all traits on one site in 2015 (Table 1) (Carlson *et*  
2 *al.*, 2019). For growth measurements in the diversity panel, the inner two plants of each four-  
3 plant plot were measured and the central plant in each three-plant plot were measured in the F<sub>1</sub>  
4 and F<sub>2</sub> families. Rust was surveyed by visually assessing percent uredospore pustule coverage  
5 on leaves (0-100%) of all the plants in each plot. Sex was scored for clonally propagated plants  
6 of each genotype growing in nursery beds and was confirmed in experimental plots.

7

### 8 ***Statistical analysis***

9 Statistical analyses were conducted using SAS<sup>®</sup> version 9.4 (SAS Institute, Cary, NC)  
10 and R version 3.2.3 (R Core Development Team). Mixed linear models were used to analyze  
11 phenotypic data implemented in SAS with the PROC MIXED statement and using the *lmer*  
12 function within the *lme4* package in R (Bates *et al.*, 2015). All dependent variables were tested  
13 for homogeneity of variances and normality using PROC UNIVARIATE using Kolmogorov-  
14 Smirnov D and Shapiro-Wilk's K statistics. Non-parametric methods were used when  
15 phenotypes that were not normally distributed could not be transformed to meet the assumptions  
16 of parametric analyses using Box-Cox powers or log-transformation. Yield data were square-root  
17 transformed to meet assumptions of normality. Pearson's product-moment correlations (*r*) were  
18 calculated among all traits. To test for statistical differences between phenotypic traits based on  
19 sex, a two-tailed Mann-Whitney *U*-test was conducted with hermaphrodite genotypes excluded.  
20 To estimate the predictability and relationship of each trait and biomass yield, multiple linear  
21 regression was performed with PROC REG using the stepwise regression method. Model  
22 adequacy was checked with a general linear model to assess the global significance with PROC  
23 GLM.

24

## 1 RESULTS

### 2 *Phenotypic variation*

3 In the diversity panel, all traits showed large differences among genotypes (Appendix  
4 S4). Effects of genotype, location, and genotype  $\times$  location were highly significant for yield  
5 ( $P < 0.05$ ) (Table 2). Overall, the greatest differences in growth traits between genotypes were for  
6 stem area (SA) and stem height (HT) (Fig. 1). The range of values across two growing seasons in  
7 the diversity panel were 0.13 to 84.38 cm<sup>2</sup> for SA and 0.11 to 4.88 m in HT (Appendix S4).  
8 There was also wide variability in stem number (STNo), which increased on average by 22%  
9 from the first to the second year. Crown form (FORM), calculated from crown diameter (CDIA),  
10 ranged from approximately 9 to 88° mean branching angle, but all genotypes had variable  
11 FORM across sites. Of the four metrics obtained from leaf scans, the greatest variation was for  
12 leaf perimeter (LFP). The same degree of variability was observed across sites for phenology and  
13 physiology traits, where stomatal conductance ( $g_s$ ) had the greatest variability with the maximum  
14 value of 1164.2 mmol m<sup>-2</sup> s<sup>-1</sup> and the minimum value of 45.5 mmol m<sup>-2</sup> s<sup>-1</sup> in year 1  
15 (Appendices S5, S6). The genotypic means for wood composition and specific gravity (SPGR)  
16 also had wide variances. The largest variation was observed for cellulose content (CLS) with a  
17 range of 37.94% difference between the highest and lowest value. On average, second year  
18 measurements of hemicellulose content (HCL) and CLS were greater than first year values by  
19 0.79% and 10.68%, respectively (Appendix S4). Lignin content (LIG) decreased by 5.48% in  
20 year 2 compared to year 1 and ash content (ASH) declined by 27.76%, but SPGR only decreased  
21 by 0.04 g cm<sup>-1</sup> in the second year.

22 In the F<sub>1</sub> and F<sub>2</sub> families, mean growth in Geneva was better than that of the diversity  
23 panel (Table 3, Appendix S7, Appendix S8). The means for SA and HT for first-year coppice  
24 growth were greater in the F<sub>1</sub> and F<sub>2</sub> families compared to the diversity panel. The first-year

1 mean SA in the diversity panel in Geneva was 14.95 cm<sup>2</sup>, while it was 16.87 and 12.62 cm<sup>2</sup> in  
2 the F<sub>1</sub> and F<sub>2</sub> families, respectively. Relative differences in first-year post-coppice HT were  
3 similar, as the diversity panel in Geneva had mean HT of 2.30 m, the mean HT in the F<sub>1</sub> family  
4 was 3.25 m and the mean HT of the F<sub>2</sub> family was 3.11 m. SPAD measurements and specific leaf  
5 area (SLA) showed similar trends with the diversity panel with lower means for both traits  
6 compared to the F<sub>1</sub> and F<sub>2</sub> families (Fig. 2).

7 In general, overall lower trait means were observed for biomass and physiological traits  
8 in the F<sub>2</sub> family compared to the F<sub>1</sub> family (Table 3). For instance, SDIA, HT, STNo, and SA  
9 were all significantly greater ( $P < 0.01$ ) in the F<sub>1</sub> family with  $t$ -values ranging from 7.3 to 14.7,  
10 as well as traits related to stem architecture, CDIA ( $t = 12.6$ ) and FORM ( $t = 12.1$ ) (Table 3).  
11 Stem area was ~33% greater in the F<sub>1</sub> family compared to the F<sub>2</sub> family in 2015. Although  
12 morphological leaf traits were significantly greater in the F<sub>1</sub> family, SLA and canopy color  
13 (RGB) were the only two traits that were not significantly different between F<sub>1</sub> and F<sub>2</sub> families,  
14 whereas SPAD was the only trait that was significantly greater in the F<sub>2</sub> family ( $t = -3.97$ ,  $P <$   
15  $0.01$ ).

### 16 *Sexually dimorphic phenotypes*

17 Significant sex differences were found in *S. purpurea*, with males producing greater  
18 growth and significantly greater means for most traits measured (Fig. 1, Table 4, Table 5). For  
19 the diversity panel in the first year of growth (2013), two traits were significantly dimorphic  
20 ( $P < 0.05$ , Table 4). Mean HT of females (1.95 m) across all three sites was 3.7% greater than  
21 males (1.88 m). Yet males had significantly heavier leaf dry weight (LFDW) than females. The  
22 number of dimorphic traits increased in year two (2014), when 11 of the traits were significantly  
23 dimorphic (Table 4). There were greater trait means in males for CDIA, leaf length (LFL), leaf  
24 width (LFW), leaf area (LFA), LFP, and LFDW. Crown form (FORM) was calculated from

1 CDIA and showed significantly lower branching angle in the males reflecting a greater crown  
2 diameter in males than in females. Mean floral (FPHE) and vegetative (VPHE) phenology  
3 measurements showed greater means for females indicating earlier bud break for males (Table  
4 4). Six traits were sexually dimorphic in the F<sub>1</sub> family (Table 5). Male means for HT and specific  
5 leaf area (SLA) were greater than for females, as was CDIA, meaning that the FORM angle was  
6 lower in males than in females. In the F<sub>1</sub> family, SDIA of female progeny was greater than that  
7 of males, whereas STNo was greater in males compared to females. In the F<sub>2</sub> family, HT was  
8 significantly greater for males, as it was in the F<sub>1</sub> family. LFDW, LFP, and LFL means were  
9 greater in females than males, while CDIA was greater for males, with a lower form angle, as  
10 was observed in the diversity panel and F<sub>1</sub> family.

11 Leaf rust severity (RUST) was surveyed during the 2015 growing season in the diversity  
12 panel and F<sub>2</sub> family. In the diversity panel in 2015, there were significant differences between  
13 the two locations surveyed ( $P < 0.05$ ). Based on percent disease severity using least square means,  
14 for Geneva, NY, females had a greater mean score (25%) for RUST than males (22%) and in  
15 Portland, NY least square means for RUST were 30% and 27% for females and males,  
16 respectively, with overall significant differences of RUST averaged across locations between  
17 males and females (Table 4, Fig. 3A). The male parents of the F<sub>1</sub> and F<sub>2</sub> families had  
18 significantly greater mean RUST scores than the female parents (Fig. 3B). Similarly, the male F<sub>2</sub>  
19 progeny had significantly greater mean RUST than the F<sub>2</sub> female progeny ( $P = 0.02$ ) (Table 5,  
20 Fig. 3B). The overall F<sub>2</sub> progeny means for RUST were greater than that of the female parent,  
21 ‘Wolcott’, but less than that of the male parent ‘Fish Creek’. Overall, there was a significant  
22 negative correlation between RUST and both SA and HT ( $P < 0.05$ ), with a significant positive  
23 correlation between RUST infection and SPAD measurements ( $P < 0.01$ ) (Appendix S9).

24

## 1 *Sex ratios*

2           There were 49 females and 29 males in the diversity panel, which were confirmed across  
3 years and experimental locations based on documented sex phenotypes in nurse beds. The  
4 diversity panel was not necessarily representative of the sex ratios in natural populations, since it  
5 was assembled from only a few selected individuals from multiple sites, rather than a thorough  
6 sampling of all individuals of a population (Gouker, *et al*, 2019). There was significant departure  
7 from the expected 1:1 segregation ratio of males and females in both the F<sub>1</sub> and F<sub>2</sub> families. The  
8 F<sub>1</sub> family consisted of 70 females and 30 males (ratio=2.33:1,  $P < 0.01$ ) and the F<sub>2</sub> family  
9 contained 266 females and 216 male genotypes (ratio=1.23:1,  $P = 0.02$ ).

10

## 11 *Allometric model for yield*

12           All measured traits from the diversity panels were used as parameters in allometric  
13 models to identify relationships between YLD and the yearly growth measurements using  
14 multiple linear regression to predict second year biomass. Separating genotypes by sex and  
15 examining allometric relationships with YLD revealed no significant difference ( $P=0.15$ ) or  
16 advantage of predicting YLD and therefore the data were not distinguished by sex in the  
17 regression model. Variable inflation factors greater than 10 were observed between total SDIA  
18 and total SA and indicated multicollinearity as indicated with the high correlation coefficient of  
19  $r=0.95$  (Appendix S10). Since SA had a greater correlation with YLD and explained a greater  
20 percentage of the variance in the model, it was kept and SDIA was removed. All other variables  
21 that did not meet the  $P < 0.05$  significance level were also removed. To test for global significance  
22 of variables, a general linear model was fitted and revealed SLA in 2014 ( $P=0.88$ ) and LFP  
23 ( $P=0.84$ ) were insignificant and were also removed as predictor variables. The best predictors for  
24 the final multiple linear regression model were SA in 2013 and 2014, HT in 2014, and

1 AugSPAD in 2014 (Appendix S5), where yearly SA measurements gave the most accurate  
2 estimates of YLD. A strong positive fit of predicted and observed biomass YLD resulted in an  
3 overall  $R^2 = 0.79$  (Appendix S10).

4

## 5 **DISCUSSION**

6 For dioecious species, genetic factors, selection pressures over time, and ecological  
7 adaptation can lead to differential fitness between males and females and result in dimorphism of  
8 secondary characteristics (Sakai and Weller, 1999). While such differential selection in males  
9 and females may be expected to lead to sex ratio bias, very few published records of such bias  
10 exist.

11 Sex ratio bias has been reported in *Salix* spp. and is most often biased towards females in  
12 an approximate 2 female:1 male ratio (Alström-Rapaport *et al.*, 1997; Rottenberg, 1998; Dudley,  
13 2006; Ueno *et al.*, 2007; Hughes *et al.*, 2009; Myers-Smith and Hik, 2012), though the closest  
14 taxonomically related genus, *Populus*, has shown male-biased ratios (Tuskan *et al.* 2012). The  
15 female bias observed in the F<sub>1</sub> and F<sub>2</sub> families of this study may be explained by the occurrence  
16 of pollen competition (certation). Especially when pollen load is high, as in the case with  
17 controlled crosses, the female determining pollen may be inherently more successful at  
18 fertilization. We can speculate that there was relaxation of female:male ratios from the F<sub>1</sub> to F<sub>2</sub>  
19 generation as a result of slight inbreeding depression, differential mortality, or environmental  
20 factors.

21 Despite the female-biased sex ratios in the F<sub>1</sub> and F<sub>2</sub> families, our results showed that  
22 males were superior to females for many traits. Comparison of coefficients of variation (CV)  
23 between sexes in each population showed consistently greater variation in males, which may  
24 indicate that males have greater plasticity in response to environmental conditions, or

1 alternatively that females spend more resources on seed production and cannot vary growth  
2 responses in relation to different environmental conditions. Yield and traits positively correlated  
3 with yield also showed greater trait means in males. Direct measurement of YLD was not  
4 significantly different, however. Within the F<sub>1</sub> family, all dimorphic traits except for DIA were  
5 male-biased. It was shown that males have earlier bud break, which would extend their growing  
6 season and may partly explain differences in leaf traits (Tharakan *et al.*, 2008). However, it has  
7 been suggested that other phenological events (i.e. leaf unfolding and duration, growth cessation  
8 and leaf abscission) affect annual biomass production, where growth cessation and late season  
9 leaf retention may also impact aboveground growth as well as nutrient recycling and storage *in*  
10 *planta* (Weih, 2009). An intensive study monitoring these additional traits could provide clues as  
11 to whether sex-specific physiological patterns are seen across other dioecious species as well.

12 Sex dimorphism has also been studied extensively in the closely-related genus *Populus*.  
13 Examination of phenotypic and gene expression data in *P. tremula* has shown no evidence of  
14 sexual dimorphism for morphological or biochemical traits (Robinson *et al.*, 2014). Minor  
15 differences across a set of growth traits observed in *P. euphratica* suggested that male trees are  
16 more vigorous than females (Petzold *et al.*, 2012). Studies of *P. deltoides* and *P. tremuloides*  
17 hybrids revealed significantly greater biomass production in males (Pauley, 1948; Farmer, 1964).  
18 When examining the evidence for sexual dimorphism in *Salix*, there are also opposing  
19 observations. In *S. planifolia*, it was reported that a larger allocation of resources is needed for  
20 reproduction in females than in males (Turcotte and Houle, 2001), which may lead to the  
21 assumption that females exhibit less biomass growth compared to males. Other studies have  
22 shown that females have growth rates similar and sometimes greater, but not significantly  
23 different, than males (Åhman, 1997; Sakai *et al.*, 2006).

1 Data from this study revealed consistent trends of dimorphism for CDIA and the  
2 associated FORM showed a significant male bias for greater CDIA and subsequent shallower  
3 branching angle for all years and populations. Specific gravity contributes to the mechanical  
4 properties of wood and is known to scale positively with biomechanical strength and therefore  
5 directly influences plant architecture (Chave *et al.*, 2009). This has practical importance for  
6 shrub willow, because plants with a wide CDIA that expands into the alleys of a field will result  
7 in biomass that may not be collected by a harvester. If specific cultivars have wide branching  
8 angles, this will result in a loss of harvestable biomass and reduction in yield.

9 Another interesting result of sexual dimorphism observed in this study was the  
10 significantly greater rust severity on male plants in the F<sub>2</sub> family and the male progenitors,  
11 whereas in the diversity panel females exhibited greater rust severity. *Melampsora* leaf rust is the  
12 most severe plant disease affecting short-rotation willow plantations where long-term stability of  
13 yield will depend on host resistance. Resistance to *Melampsora* spp. has been mapped to  
14 multiple linkage groups in backcross and full-sib families in *S. viminalis* (Rönnerberg-Wästljung *et*  
15 *al.*, 2008; Hanley *et al.*, 2011; Samils *et al.*, 2011) with significant QTL for rust resistance on  
16 Chr01, Chr05, and Chr10 in *S. purpurea* (Carlson *et al.*, 2019). Despite the sex dimorphism for  
17 RUST from this study in the F<sub>2</sub> family, no resistance QTL have mapped to Chr15 near the SDR.  
18 Among the studies of rust severity in willow, there are few that have provided information on  
19 sex dimorphism. A study of largely unrelated commercial cultivars has indicated that there is  
20 greater rust severity on female plants (Moritz *et al.*, 2016). Conversely, it has been observed in  
21 two other *Salix* studies that male-biased rust severity also exists (McCracken and Dawson, 2003;  
22 Pei *et al.*, 2008). Our results also present conflicting evidence between the diversity panel and F<sub>2</sub>  
23 family. The initial selection and cross of 94006 and 94001 had significantly different rust  
24 susceptibilities, as well as the full-sib F<sub>1</sub> progeny ‘Wolcott’ and ‘Fish Creek’ which had greater



1 rust severity than the parental genotypes. The subsequent cross of these full-sibs was used to  
2 generate the F<sub>2</sub> full-sib family which also showed significantly greater rust susceptibility in male  
3 genotypes. Therefore, these differences may be a result of a genetic bottle neck through selective  
4 breeding which skewed rust susceptibility towards male genotypes.

5 Differences in observed severity of males and females between the diversity panel and  
6 the F<sub>2</sub> family could be due to the timing of rust assessment. This may be particularly important  
7 for the higher level of rust incidence in Portland, NY, which was surveyed late in the season and  
8 disease had already advanced causing extensive pre-mature defoliation and rendering phenotypic  
9 differences that may exist between sexes indistinguishable. This suggests that differential rust  
10 susceptibility could also be driven by phenological differences between male and female plants.  
11 It is hypothesized that through life-history trade-offs of sexual morphs in dioecious species,  
12 females typically allocate greater resources towards reproduction and defense against pests and  
13 diseases (Seger and Eckhart, 1996; Vega-Frutis *et al.*, 2013), and males invest more resources  
14 into primary growth (Delph, 1999; Obeso, 2002). Additionally, there may be differences in  
15 mechanical or biochemical defense mechanisms that we did not measure and for which there are  
16 limited studies examining this topic (Bañuelos *et al.*, 2004).

17 The SPAD values observed in this study, used as a non-destructive method to quantify  
18 nitrogen status in the plant, showed significantly greater values in nitrogen amended versus  
19 control plots, but also significantly greater values in males than females in the diversity panel.  
20 The male-biased nitrogen capacity could possibly have been selected for by a greater nitrogen  
21 requirement for pollen production (Carolyn and Rundel, 1979, Boecklen *et al.*, 1990) and the  
22 greater resource allocation towards primary growth. It may also be that females require a larger  
23 investment of nitrogen for seed production leaving more nitrogen available in males as observed  
24 by the SPAD readings. Although, a review conducted by Hultine (2016) examining differential

1 resource acquisition between sexes of 22 species across multiple environments, concluded that  
2 females generally do not have greater nutrient uptake or efficiency compared with males under  
3 optimal growing conditions. Based on evidence so far, there tends to be greater nitrogen content  
4 in males plants in willow and other plant species, however, it is uncertain of the exact  
5 mechanisms contributing to these sexually dimorphic observations.

6

## 7 **CONCLUSIONS**

8 Shrub willows include very diverse species used in a number of horticultural applications  
9 ranging from biomass crops, stream bank stabilization, living walls or snow fences, ornamental  
10 landscaping, and riparian buffers (Kuzovkina & Quigley, 2005; Stott, 1992). Evidence of sexual  
11 dimorphism for key traits suggests that sex of clones selected for particular uses can influence  
12 performance. This study demonstrates that *S. purpurea* expresses secondary sexual dimorphism  
13 for various traits where males in both a natural collection and in breeding populations responded  
14 more positively to multi-environmental and multi-year growing conditions. These findings also  
15 showed sex-specific differences in plasticity in response nitrogen amendments and disease  
16 pressure providing insights into resource allocation for primary versus reproductive growth, but  
17 whether there is sex-specific niche partitioning in shrub willow remains to be further evaluated.  
18 This study also determined that there is evidence of female biased sex ratio in *S. purpurea*. The  
19 results suggest that biased sex ratios in *S. purpurea* may be more strongly dependent on genetics,  
20 but recent advances in genomics will lead to genetic markers for early sex determination to help  
21 test this hypothesis.

22

## 23 **ACKNOWLEDGEMENTS**

1 This work was supported by grants from the United States Department of Agriculture National  
2 Institute of Food and Agriculture through the Northeast Sun Grant Center (NE 11-48) and to the  
3 Northeast Woody/Warm-Season Biomass Consortium (NEWBio) (USDA-NIFA grant No. 2012-  
4 68005-19703), and also by a grant from the National Science Foundation Dimensions in  
5 Biodiversity Program (DEB-1542486). Junzhu Zou was supported by Chinese Scholarship  
6 Council (CSC). We thank all of those who provided technical assistance with field trial  
7 establishment, maintenance, and harvesting, especially: Curt Carter, Matt Christiansen, Brian  
8 DeGasperis, Lauren Carlson, Dawn Fishback, Steve Gordner, Michael Rosato, and Jeffrey  
9 Teague.

10

#### 11 **AUTHOR CONTRIBUTIONS**

12 F.E.G., C.H.C. and L.B.S. planned and designed the research. F.E.G. and C.H.C. wrote the first  
13 draft of the manuscript. F.E.G, C.H.C., L.B.S., J.Z., C.M.C., C.D.S., and L.M.E. performed the  
14 experiments, collected data, and analyzed the data. All authors reviewed and revised the final  
15 manuscript.

16

17

18

1 **LITERATURE CITED**

- 2
- 3 Åhman I. 1997. Growth, herbivory and disease in relation to gender in *Salix viminalis* L.  
4 *Oecologia*, 111: 61-68.
- 5 Ainsworth C. 2000. Boys and girls come out to play: The molecular biology of dioecious plants.  
6 *Annals of Botany*, 86: 211-221.
- 7 Akagi T, Henry IM, Tao R, Comai L. 2014. A Y-chromosome–encoded small RNA acts as a sex  
8 determinant in persimmons. *Science*, 346: 646-650.
- 9 Alström-Rapaport C, Lascoux M, Gullberg U. 1997. Sex determination and sex ratio in the  
10 dioecious shrub *Salix viminalis* L. *Theoretical and Applied Genetics*, 94: 493-497.
- 11 Aravanopoulos FA, Zsuffa L. 1998. Heterozygosity and biomass production in *Salix*  
12 *eriocephala*. *Heredity*, 81: 396-403.
- 13 Arnold SJ. 1994. Bateman's principles and the measurement of sexual selection in plants and  
14 animals. *The American Naturalist*, 144: S126-S149.
- 15 Bañuelos M-J, Sierra M, Obeso J-R. 2004. Sex, secondary compounds and asymmetry. Effects  
16 on plant–herbivore interaction in a dioecious shrub. *Acta Oecologica*, 25: 151-157.
- 17 Barrett SCH, Yakimowski SB, Field DL, Pickup M. 2010. Ecological genetics of sex ratios in  
18 plant populations. *Philosophical Transactions of the Royal Society B: Biological*  
19 *Sciences*, 365: 2549-2557.
- 20 Bates D, Mächler M, Bolker B, Walker S. 2015. Fitting linear mixed-effects models using lme4.  
21 *Journal of Statistical Software*, 67: 48.
- 22 Bawa KS. 1980. Evolution of dioecy in flowering plants. *Annual Review of Ecology and*  
23 *Evolutionary Systematics*, 11: 15-39.
- 24 Begley D, McCracken AR, Dawson WM, Watson S. 2009. Interaction in short rotation coppice  
25 willow, *Salix viminalis* genotype mixtures. *Biomass and Bioenergy*, 33: 163-173.
- 26 Bergero R, Charlesworth D, Filatov DA, Moore RC. 2008. Defining regions and rearrangements  
27 of the *Silene latifolia* Y chromosome. *Genetics*, 178: 2045-2053.
- 28 Boecklen, W. J., Mopper, S., & Price, P. W. (1994). Sex-biased herbivory in arroyo willow: Are  
29 there general patterns among herbivores? *Oikos*, 71: 267-272.
- 30 Boecklen, W. J., Price, P. W., & Mopper, S. (1990). Sex and drugs and herbivores: Sex-biased  
31 herbivory in arroyo willow (*Salix Lasiolepis*). *Ecology*, 71:, 581-588.

- 1 Carlson CH, Choi Y, Chan AP, Serapiglia MJ, Town CD, Smart LB. 2017. Dominance and  
2 sexual dimorphism pervade the *Salix purpurea* L. transcriptome. *Genome Biology and*  
3 *Evolution* 9: 2377-2394.
- 4 Carlson CH, Gouker FE, Crowell CR, Evans, LM, DiFazio SP, Smart CD, and Smart LB (2019)  
5 Joint linkage and association mapping of complex traits in shrub willow (*Salix purpurea*  
6 L.). *Annals of Botany*, 124: 701-715.
- 7 Carolyn SW, Rundel PW. 1979. Sexual dimorphism and resource allocation in male and female  
8 shrubs of *Simmondsia chinensis*. *Oecologia*, 44: 34-39.
- 9 Charlesworth D. 1999. Theories of the evolution of dioecy. In M. A. Geber, T. E. Dawson, & L.  
10 F. Delph (Eds.), *Gender and sexual dimorphism in flowering plants* (pp. 33-60). Berlin:  
11 Springer.
- 12 Charlesworth D. 2002. Plant sex determination and sex chromosomes. *Heredity*, 88: 94-101.
- 13 Charlesworth D. 2013. Plant sex chromosome evolution. *Journal of Experimental Botany*, 64:  
14 405-420.
- 15 Charlesworth D. 2015. Plant contributions to our understanding of sex chromosome evolution.  
16 *New Phytologist*, 208: 52-65.
- 17 Charlesworth D, Guttman DS. 1999. The evolution of dioecy and plant sex chromosome  
18 systems. In C. Ainsworth (Ed.), *Sex determination in plants* (pp. 25-49). Oxford, UK:  
19 BIOS.
- 20 Charlesworth D, Willis JH. 2009. The genetics of inbreeding depression. *Nature Reviews in*  
21 *Genetics*, 10: 783-796.
- 22 Chave J, Coomes D, Jansen S, Lewis SL, Swenson NG, Zanne AE. 2009. Towards a worldwide  
23 wood economics spectrum. *Ecological Letters*, 12: 351-366.
- 24 Che-Castaldo C, Crisafulli CM, Bishop JG, Fagan WF. 2015. What causes female bias in the  
25 secondary sex ratios of the dioecious woody shrub *Salix sitchensis* colonizing a primary  
26 successional landscape? *American Journal of Botany*, 102: 1309-1322.
- 27 Chen Y, Wang T, Fang L, Li X, Yin T. 2016. Confirmation of single-locus sex determination  
28 and female heterogamety in willow based on linkage analysis. *PLoS ONE*, 11: e0147671.
- 29 Collinson ME. 1992. The early fossil history of Salicaceae: A brief review. *Proceedings of the*  
30 *Royal Society of Edinburgh Section B: Biological Sciences*, 98B: 155-167.

- 1 Cortez D, Marin R, Toledo-Flores D, *et al.* 2014. Origins and functional evolution of Y  
2 chromosomes across mammals. *Nature*, 508: 488-493.
- 3 Dawson TE, Geber MA. 1999. Sexual dimorphism in physiology and morphology. In M. A.  
4 Geber, T. E. Dawson, & L. F. Delph (Eds.), *Gender and sexual dimorphism in flowering*  
5 *plants* (pp. 175-215). Berlin: Springer.
- 6 Delph LF. 1999. Sexual dimorphism in life history. In M. A. Geber, T. E. Dawson, & L. F.  
7 Delph (Eds.), *Gender and sexual dimorphism in flowering plants* (pp. 149-173). Berlin, :  
8 Springer.
- 9 Delph LF. 2009. Sex Allocation: Evolution to and from dioecy. *Current Biology*, 19: R249-  
10 R251.
- 11 Dickmann D, Kuzovkina J. 2008. Poplars and willows in the world *Poplars and willows in the*  
12 *world, Meeting the needs of society and the environment. International Poplar*  
13 *Commission* (pp. 8-91). Rome: Food and Agriculture Organization.
- 14 Dudley LS. 2006. Ecological correlates of secondary sexual dimorphism in *Salix glauca*  
15 (Salicaceae). *American Journal of Botany*, 93: 1775-1783.
- 16 Dudley LS, Galen C. 2007. Stage-dependent patterns of drought tolerance and gas exchange vary  
17 between sexes in the alpine willow, *Salix glauca*. *Oecologia*, 153: 1-9.
- 18 Edwards AWF. 2000. Carl Düsing (1884) on the regulation of the sex-ratio. *Theoretical*  
19 *Population Biology*, 58: 255-257.
- 20 Ehlers BK, Bataillon T. 2007. 'Inconstant males' and the maintenance of labile sex expression in  
21 subdioecious plants. *New Phytologist*, 174: 194-211.
- 22 Farmer RE. 1964. Sex ratio and sex-related characteristics in eastern cottonwood. *Silvae*  
23 *Genetica*, 13: 116-118.
- 24 Fechter I, Hausmann L, Daum M, *et al.* 2012. Candidate genes within a 143 kb region of the  
25 flower sex locus in *Vitis*. *Molecular Genetics and Genomics*, 287: 247-259.
- 26 Feng G, Sanderson BJ, Liu J, Ma T, Smart LB, DiFazio,SP, Olson MS. 2020). Pathways to sex  
27 determination in plants: How many roads lead to Rome? *Current Opinion in Plant*  
28 *Biology*, 54: 61-68.
- 29 Field DL, Pickup M, Barrett SCH. 2013a. Comparative analyses of sex-ratio variation in  
30 dioecious flowering plants. *Evolution*, 67: 661-672.

- 1 Field DL, Pickup M, Barrett SCH. 2013b. Ecological context and metapopulation dynamics  
2 affect sex-ratio variation among dioecious plant populations. *Annals of Botany*, 111: 917-  
3 923.
- 4 Fisher RA. 1930. *The genetical theory of natural selection: a complete variorum edition*.  
5 London, UK: Oxford University Press.
- 6 Geraldès A, Hefer CA, Capron A, *et al.* 2015. Recent Y chromosome divergence despite ancient  
7 origin of dioecy in poplars (*Populus*). *Molecular Ecology*, 24: 3243-3256.
- 8 Gouker, F.E., DiFazio, S.P., Bubner, B., Zander, M., and Smart, L.B. (2019) Genetic diversity  
9 and population structure of native, naturalized, and cultivated *Salix purpurea*. *Tree*  
10 *Genet. Genomes* DOI: 10.1007/s11295-019-1359-0.
- 11 Hanley SJ, Pei MH, Powers SJ, *et al.* 2011. Genetic mapping of rust resistance loci in biomass  
12 willow. *Tree Genetics and Genomes*, 7: 597-608.
- 13 Hou J, Ye N, Zhang D, *et al.* 2015. Different autosomes evolved into sex chromosomes in the  
14 sister genera of *Salix* and *Populus*. *Scientific Reports*, 5: 1-6.
- 15 Hughes FMR, Johansson M, Xiong S, *et al.* 2009. The influence of hydrological regimes on sex  
16 ratios and spatial segregation of the sexes in two dioecious riparian shrub species in  
17 northern Sweden. *Plant Ecology*, 208: 77-92.
- 18 Hultine KR, Grady KC, Wood TE, Shuster SM, Stella JC, Whitham TG. 2016. Climate change  
19 perils for dioecious plant species. *Nature Plants*, 2: 16109.
- 20 Kenaley SC, Smart LB, Hudler GW. 2014. Genetic evidence for three discrete taxa of  
21 *Melampsora* (*Pucciniales*) affecting willows (*Salix* spp.) in New York State. *Fungal*  
22 *Biology*, 118: 704-20.
- 23 Kersten B, Pakull B, Groppe K, Lueneburg J, Fladung M. 2014. The sex-linked region in  
24 *Populus tremuloides* Turesson 141 corresponds to a pericentromeric region of about two  
25 million base pairs on *P. trichocarpa* chromosome 19. *Plant Biology*, 16: 411-418.
- 26 Kuzovkina, YA and Quigley, MF. (2005). Willows beyond wetlands: Uses of *Salix* L. species for  
27 environmental projects. *Water, Air, and Soil Pollution*, 162: 183–204.
- 28 Lewis D. 1942. The evolution of sex in flowering plants. *Biological Reviews*, 17: 46-67.
- 29 Lin J, Gibbs JP, Smart LB. 2009. Population genetic structure of native versus naturalized  
30 sympatric shrub willows (*Salix*: Salicaceae). *American Journal of Botany*, 96: 771-785.
- 31 Lloyd DG. 1974. Female-predominant sex ratios in angiosperms. *Heredity*, 32: 35-44.

- 1 Lloyd DG. 1982. Selection of combined versus separate sexes in seed plants. *The American*  
2 *Naturalist*, 120: 571-585.
- 3 Lloyd DG, Webb CJ. 1977. Secondary sex characters in plants. *Botanical Reviews*, 43: 177-216.
- 4 McCracken AR, Dawson WM. 2003. Rust disease (*Melampsora epitea*) of willow (*Salix* spp.)  
5 grown as short rotation coppice (SRC) in inter- and intra-species mixtures. *Annals of*  
6 *Applied Biology*, 143: 381-393.
- 7 Ming R, Bendahmane A, Renner SS. 2011. Sex chromosomes in land plants. *Annual Review of*  
8 *Plant Biology*, 62: 485-514.
- 9 Ming R, Wang J, Moore PH, Paterson AH. 2007. Sex chromosomes in flowering plants.  
10 *American Journal of Botany*, 94: 141-150.
- 11 Moritz KK, Björkman C, Parachnowitsch AL, Stenberg JA. 2016. Female *Salix viminalis* are  
12 more severely infected by *Melampsora* spp. but neither sex experiences associational  
13 effects. *Ecology and Evolution*, 6: 1154-1162.
- 14 Mosseler A, Zsuffa L. 1989. Sex expression and sex ratios in intra- and interspecific hybrid  
15 families of *Salix* L. *Silvae Genetica*, 38: 12-17.
- 16 Myers-Smith IH, Hik DS. 2012. Uniform female-biased sex ratios in alpine willows. *American*  
17 *Journal of Botany*, 99: 1243-1248.
- 18 Obeso J. 2002. The costs of reproduction in plants. *New Phytologist*, 155: 321-348.
- 19 Pakull B, Groppe K, Mecucci F, Gaudet M, Sabatti M, Fladung M. 2011. Genetic mapping of  
20 linkage group XIX and identification of sex-linked SSR markers in a *Populus*  
21 *tremula* × *Populus tremuloides* cross. *Canadian Journal of Forest Research*, 41.
- 22 Pakull B, Groppe K, Meyer M, Markussen T, Fladung M. 2009. Genetic linkage mapping in  
23 aspen (*Populus tremula* L. and *Populus tremuloides* Michx.). *Tree Genetics and*  
24 *Genomes*, 5.
- 25 Pauley SS. 1948. Sex and vigor in *Populus*. *Science*, 108: 302-303.
- 26 Pei MH, Lindegaard K, Ruiz C, Bayon C. 2008. Rust resistance of some varieties and recently  
27 bred genotypes of biomass willows. *Biomass and Bioenergy*, 32: 453-459.
- 28 Peto FH. 1938. Cytology of poplar species and natural hybrids. *Canadian Journal of Research*,  
29 16c: 445-455.
- 30 Petzold A, Pfeiffer T, Jansen F, Eusemann P, Schnittler M. 2012. Sex ratios and clonal growth in  
31 dioecious *Populus euphratica* Oliv., Xinjiang Prov., Western China. *Trees*, 27: 729-744.



- 1 Phillips IS. 2002. *Quantitative genetics of traits predictive of biomass yield in first- and second-*  
2 *generation Salix eriocephala*. (M.S.), SUNY College of Environmental Science and  
3 Forestry, Syracuse, NY.
- 4 Pucholt P, Rönnberg-Wästljung A-C, Berlin S. 2015. Single locus sex determination and female  
5 heterogamety in the basket willow (*Salix viminalis* L.). *Heredity*, 114: 575-583.
- 6 Renner SS. 2014. The relative and absolute frequencies of angiosperm sexual systems: Dioecy,  
7 monoecy, gynodioecy, and an updated online database. *American Journal of Botany*, 101:  
8 1588-1596.
- 9 Robinson KM, Delhomme N, Mähler N, *et al.* 2014. *Populus tremula* (European aspen) shows  
10 no evidence of sexual dimorphism. *BMC Plant Biology*, 14: 1-14.
- 11 Rönnberg-Wästljung A-C. 2001. Genetic structure of growth and phenological traits in *Salix*  
12 *viminalis*. *Canadian Journal of Forest Research*, 31: 276-282.
- 13 Rönnberg-Wästljung A-C, Samils B, Tsarouhas V, Gullberg U. 2008. Resistance to *Melampsora*  
14 *larici-epitea* leaf rust in *Salix*: Analyses of quantitative trait loci. *Journal of Applied*  
15 *Genetics*, 49: 321-331.
- 16 Rottenberg A. 1998. Sex ratio and gender stability in the dioecious plants of Israel. *Botanical*  
17 *Journal of the Linnean Society*, 128: 137-148.
- 18 Sanderson, B. J., Wang, L. , Tiffin, P. , Wu, Z. and Olson, M. S. (2019), Sex□biased gene  
19 expression in flowers, but not leaves, reveals secondary sexual dimorphism in *Populus*  
20 *balsamifera*. *New Phytol*, 221: 527-539.
- 21 Sakai A, Sasa A, Sakai S. 2006. Do sexual dimorphisms in reproductive allocation and new  
22 shoot biomass increase with an increase of altitude? A case of the shrub willow *Salix*  
23 *reini* (Salicaceae). *American Journal of Botany*, 93: 988-992.
- 24 Sakai AK, Weller SG. 1999. Gender and sexual dimorphism in flowering plants: A review of  
25 terminology, biogeographic patterns, ecological correlates, and phylogenetic approaches.  
26 In M. A. Geber, T. E. Dawson, & L. F. Delph (Eds.), *Gender and sexual dimorphism in*  
27 *flowering plants* (pp. 1-31). Berlin: Springer.
- 28 Samils B, Rönnberg-Wästljung A-C, Stenlid J. 2011. QTL mapping of resistance to leaf rust in  
29 *Salix*. *Tree Genetics and Genomes*, 7: 1219-1235.
- 30 Seger J, Eckhart VM. 1996. Evolution of sexual systems and sex allocation in plants when  
31 growth and reproduction overlap. *Proceedings of the Royal Society of London B*  
32 *Biological Sciences*, 263: 833-841.

- 1 Semerikov V, Lagercrantz U, Tsarouhas V, Rönnerberg-Wästljung A, Alström-Rapaport C,  
2 Lascoux M. 2003. Genetic mapping of sex-linked markers in *Salix viminalis* L. *Heredity*,  
3 91: 293-299.
- 4 Serapiglia MJ, Cameron KD, Stipanovic AJ, Abrahamson LP, Volk TA, Smart LB. 2013. Yield  
5 and woody biomass traits of novel shrub willow hybrids at two contrasting sites.  
6 *Bioenergy Research*, 6: 533-546.
- 7 Serapiglia MJ, Gouker FE, Hart JF, *et al.* 2014a. Ploidy level affects important biomass traits of  
8 novel shrub willow (*Salix*) hybrids. *Bioenergy Research*, 8: 259-269.
- 9 Serapiglia MJ, Gouker FE, Smart LB. 2014b. Early selection of novel triploid hybrids of shrub  
10 willow with improved biomass yield relative to diploids. *BMC Plant Biology*, 14: 74.
- 11 Smart LB, Cameron KD. 2008. Genetic improvement of willow (*Salix* spp.) as a dedicated  
12 energy crop. In W. E. Vermerris (Ed.), *Genetic improvement of bioenergy crops* (pp. 377-  
13 396). New York: Springer-Verlag.
- 14 Spigler RB, Lewers KS, Main DS, Ashman TL. 2008. Genetic mapping of sex determination in a  
15 wild strawberry, *Fragaria virginiana*, reveals earliest form of sex chromosome. *Heredity*,  
16 101: 507-517.
- 17 Stehlik I, Barrett SCH. 2006. Pollination intensity influences sex ratios in dioecious *Rumex*  
18 *nivalis*, a wind-pollinated plant. *Evolution*, 60: 1207-1214.
- 19 Stott, K. G. (1992). Willows in the service of man. *Proceedings of the Royal Society of*  
20 *Edinburgh*. Section B. Biological Sciences, 98: 169–182.
- 21 Sun G, Ji Q, Dilcher DL, Zheng S, Nixon KC, Wang X. 2002. Archaeofractaceae, a new basal  
22 angiosperm family. *Science*, 296: 899-904.
- 23 Taylor DR. 1999. Genetics of sex ratio variation among natural populations of a dioecious plant.  
24 *Evolution*, 53: 55-62.
- 25 Tharakan PJ, Volk TA, Nowak CA, Ofezu GJ. 2008. Assessment of canopy structure, light  
26 interception, and light-use efficiency of first year regrowth of shrub willow (*Salix* sp.).  
27 *Bioenergy Research*, 1: 229-238.
- 28 Turcotte J, Houle G. 2001. Reproductive costs in *Salix plantifolia* ssp. *plantifolia* in subarctic  
29 Québec, Canada. *Écoscience*, 8: 506-512.
- 30 Tuskan GA, DiFazio S, Jansson S, *et al.* 2006. The genome of black cottonwood, *Populus*  
31 *trichocarpa* (Torr. & Gray). *Science*, 313: 1596-1604.

- 1 Tuskan GA, DiFazio S, Faivre-Rampant P, *et al.* 2012. The obscure events contributing to the  
2 evolution of an incipient sex chromosome in *Populus*: A retrospective working  
3 hypothesis. *Tree Genetics and Genomes*, 8: 559-571.
- 4 Ueno N, Suyama Y, Seiwa K. 2007. What makes the sex ratio female-biased in the dioecious  
5 tree *Salix sachalinensis*? *Journal of Ecology*, 95: 951-959.
- 6 van Buijtenen JP, Einspahr DW. 1959. Note on the presence of sex chromosomes in *Populus*  
7 *tremuloides*. *Botanical Gazette*, 121: 60-61.
- 8 Vega-Frutis R, Munguía-Rosas MA, Varga S, Kytöviita M-M. 2013. Sex-specific patterns of  
9 antagonistic and mutualistic biotic interactions in dioecious and gynodioecious plants.  
10 *Perspectives in Plant Ecology, Evolution and Systematics*, 15: 45-55.
- 11 Wang J, Na JK, Yu Q, *et al.* 2012. Sequencing papaya X and Yh chromosomes reveals  
12 molecular basis of incipient sex chromosome evolution. *Proceedings of the National*  
13 *Academy of Sciences of the United States of America*, 109: 13710-13715.
- 14 Weih M. 2009. Genetic and environmental variation in spring and autumn phenology of biomass  
15 willows (*Salix* spp.): Effects on shoot growth and nitrogen economy. *Tree Physiology*,  
16 29: 1479-1490.
- 17 Westergaard M. 1958. The mechanism of sex determination in dioecious flowering plants.  
18 *Advances in Genetics*, 9: 217-281.
- 19 Wolf DE, Satkoski JA, White K, Rieseberg LH. 2001. Sex determination in the androdioecious  
20 plant *Datisca glomerata* and its dioecious sister species *D. cannabina*. *Genetics*, 159:  
21 1243-1257.
- 22 Yang L, Gong F, Xiong E, Wang W. 2015. Proteomics: A promising tool for research on sex-  
23 related differences in dioecious plants. *Frontiers in Plant Science*, 6: 954.
- 24 Zhou R, Macaya-Sanz D, Rodgers-Melnick E, Carlson CH, Gouker FE, Evens LM, Schmutz J,  
25 Jenkins JW, Yan J, Tuskan GA, Smart LB, DiFazio SP. 2018. Characterization of a large  
26 sex determination region in *Salix purpurea* L. (Salicaceae). *Molecular Genetics and*  
27 *Genomics* 293: 1437-1452.

28

**Table 1.** Phenotypic traits measured in the *S. purpurea* F<sub>1</sub>, F<sub>2</sub>, and diversity panel.

| Trait                      | Abbreviation | Units                                |
|----------------------------|--------------|--------------------------------------|
| <b><i>Biomass</i></b>      |              |                                      |
| Height                     | HT           | m                                    |
| Stem number                | STNo         | #                                    |
| Stem diameter              | DIA          | mm                                   |
| Total stem area            | SA           | cm <sup>2</sup>                      |
| Internode length           | INL          | cm                                   |
| Biomass Yield              | YLD          | dry Mg ha <sup>-1</sup>              |
| <b><i>Foliar</i></b>       |              |                                      |
| Leaf length                | LFL          | cm                                   |
| Leaf width                 | LFW          | cm                                   |
| Leaf area                  | LFA          | cm <sup>2</sup>                      |
| Leaf perimeter             | LFP          | cm                                   |
| Leaf dry weight            | LFDW         | g                                    |
| Specific leaf area         | SLA          | cm <sup>2</sup> g <sup>-1</sup>      |
| <b><i>Architecture</i></b> |              |                                      |
| Crown diameter             | CDIA         | cm                                   |
| Crown form                 | FORM         | degrees °                            |
| <b><i>Composition</i></b>  |              |                                      |
| Hemicellulose              | HCL          | %                                    |
| Cellulose                  | CLS          | %                                    |
| Lignin                     | LIG          | %                                    |
| Ash                        | ASH          | %                                    |
| Specific gravity           | SPGR         | g cm <sup>-3</sup>                   |
| <b><i>Physiology</i></b>   |              |                                      |
| August SPAD                | SPAD1        | SPAD units                           |
| September SPAD             | SPAD2        | SPAD units                           |
| Stomatal<br>conductance    | $g_s$        | mmol m <sup>-2</sup> s <sup>-1</sup> |
| Canopy color               | RGB          | RGB                                  |
| Survival                   | SRV          | %                                    |
| <b><i>Phenology</i></b>    |              |                                      |
| Vegetative<br>phenology    | VPHE         | day of year                          |
| Floral phenology           | FPHE         | day of year                          |
| <b><i>Pathology</i></b>    |              |                                      |
| Rust severity              | RUST         | %                                    |



**Table 2.** Mixed model test of effects of genotype and location on yield.

| <b>Source</b>       | <b>DF</b> | <b>F Ratio</b> | <b>Pr &gt; F</b> |
|---------------------|-----------|----------------|------------------|
| Location            | 2         | 155.23         | <0.0001*         |
| Genotype            | 77        | 11.51          | <0.0001*         |
| Genotype × Location | 154       | 1.80           | <0.0001*         |

\*Significant differences at  $P < 0.05$

1

**Table 3.** Means and standard deviations of phenotypic traits in the *S. purpurea* intraspecific F<sub>1</sub> family (n=100) and F<sub>2</sub> family (n=482) in Geneva, NY.

| Trait <sup>1</sup>         | F <sub>1</sub> <i>S. purpurea</i> family |             | F <sub>2</sub> <i>S. purpurea</i> family |             | <i>t</i> -value <sup>2</sup> |
|----------------------------|------------------------------------------|-------------|------------------------------------------|-------------|------------------------------|
|                            | Mean ±SE                                 | Min - Max   | Mean ±SE                                 | Min - Max   |                              |
| <b><i>Biomass</i></b>      |                                          |             |                                          |             |                              |
| HT                         | 3.26 ±0.19                               | 2.15 - 4.78 | 3.11 ±0.09                               | 0.98 - 4.31 | 14.7*                        |
| STNo                       | 21.8 ±0.32                               | 6.00 - 41.0 | 18.7 ±0.16                               | 1.00 - 44.0 | 8.51*                        |
| SDIA                       | 9.44 ±0.05                               | 6.36 - 12.4 | 8.81 ±0.02                               | 5.00 - 12.4 | 12.9*                        |
| SA                         | 16.9 ±0.28                               | 4.48 - 33.3 | 12.6 ±0.12                               | 2.80 - 37.7 | 7.30*                        |
| <b><i>Foliar</i></b>       |                                          |             |                                          |             |                              |
| LFL                        | 9.84 ±0.06                               | 6.52 - 13.9 | 9.15 ±0.03                               | 4.58 - 18.9 | 9.97*                        |
| LFW                        | 2.18 ±0.02                               | 1.40 - 4.93 | 2.04 ±0.01                               | 1.10 - 12.7 | 4.90*                        |
| LFA                        | 17.2 ±0.19                               | 8.19 - 33.8 | 14.9 ±0.08                               | 4.08 - 37.9 | 11.1*                        |
| LFP                        | 22.4 ±0.28                               | 13.8 - 57.8 | 21.0 ±0.12                               | 9.54 - 58.2 | 4.80*                        |
| LFDW                       | 0.13 ±0.002                              | 0.06 - 0.28 | 0.11 ±0.001                              | 0.03 - 0.41 | 9.74*                        |
| SLA                        | 134 ±0.89                                | 97.0 - 233  | 132 ±0.42                                | 61.9 - 361  | 1.15                         |
| <b><i>Architecture</i></b> |                                          |             |                                          |             |                              |
| CDIA                       | 36.9 ±0.43                               | 18.1 - 84.7 | 31.3 ±0.19                               | 3.10 - 77.0 | 12.6*                        |
| FORM                       | 40.4 ±0.32                               | 19.8 - 59.3 | 45.2 ±0.17                               | 21.6 - 84.2 | 12.1*                        |
| <b><i>Physiology</i></b>   |                                          |             |                                          |             |                              |
| SPAD1                      | 55.9 ±0.29                               | 11.1 - 76.3 | 57.2 ±0.13                               | 26.2-91.9   | -3.97*                       |
| RGB                        | 112 ±0.78                                | 55.5 - 158  | 111 ±0.37                                | 48.3-168    | 0.90                         |
| SRV                        | 99.7 ±0.20                               | 33.3 - 100  | 99.1 ±0.15                               | 0.00 - 100  | 2.70*                        |
| <b><i>Pathology</i></b>    |                                          |             |                                          |             |                              |
| RUST                       | -                                        | -           | 0.08 ±0.002                              | 0.00-0.86   | -                            |

<sup>1</sup>Phenotypic traits were measured in 2015. See Materials and Methods for trait definitions and Table 1 for abbreviations

<sup>2</sup>Student's *t*-test statistic, where \* denotes significant differences among populations at a *P*<0.01 level-of-confidence, with positive values indicating greater means in the F<sub>1</sub> and negative value indicating greater means in the F<sub>2</sub>.

**Table 4.** Comparison of phenotypic traits for female and male individuals in the *S. purpurea* diversity panel across three growing seasons.

| Trait                | Female (n=49)        |              | Male (n=29)          |               | P                  | Diff (%)     |
|----------------------|----------------------|--------------|----------------------|---------------|--------------------|--------------|
|                      | Mean ± SE            | CV (%)       | Mean ± SE            | CV (%)        |                    |              |
| <b>2013</b>          |                      |              |                      |               |                    |              |
| <b>HT</b>            | <b>1.95 ±0.02</b>    | <b>28.04</b> | <b>1.88 ±0.02</b>    | <b>28.81</b>  | <b>0.05**</b>      | <b>-3.29</b> |
| STNo                 | 18.14 ±0.34          | 54.76        | 17.63 ±0.45          | 58.43         | 0.35               | -2.82        |
| SDIA                 | 7.3 ±0.06            | 22.62        | 7.38 ±0.07           | 21.62         | 0.38               | 1.22         |
| SA                   | 9.4 ±0.24            | 75.84        | 9.14 ±0.31           | 76.82         | 0.49               | -2.75        |
| INL                  | 13.58 ±0.17          | 37.74        | 13.38 ±0.22          | 37.19         | 0.55               | -1.47        |
| LFL                  | 6.91 ±0.07           | 23.58        | 7.02 ±0.09           | 23.68         | 0.35               | 1.62         |
| LFW                  | 1.69 ±0.05           | 72.05        | 1.85 ±0.07           | 67.64         | 0.06               | 9.31         |
| LFA                  | 8.86 ±0.18           | 49.53        | 9.42 ±0.24           | 47.89         | 0.08*              | 6.32         |
| LFP                  | 23.9 ±1              | 101.00       | 24.19 ±1.33          | 102.54        | 0.85               | 1.18         |
| <b>LFDW</b>          | <b>0.0891 ±0.001</b> | <b>42.76</b> | <b>0.0896 ±0.003</b> | <b>58.78</b>  | <b>0.01***</b>     | <b>9.17</b>  |
| SLA                  | 128.14 ±3.73         | 70.66        | 131.54 ±5.33         | 75.42         | 0.56               | 2.65         |
| HCL                  | 17.54 ±0.04          | 5.26         | 17.67 ±0.05          | 5.43          | 0.10*              | 0.72         |
| CLS                  | 37.55 ±0.13          | 8.53         | 37.55 ±0.18          | 9.14          | 0.98               | 0.02         |
| LIG                  | 28.9 ±0.09           | 7.43         | 28.89 ±0.11          | 7.37          | 0.96               | -0.03        |
| ASH                  | 2.16 ±0.02           | 26.87        | 2.18 ±0.03           | 28.82         | 0.44               | 1.23         |
| SPGR                 | 0.45 ±0              | 15.97        | 0.45 ±0.004          | 14.69         | 0.96               | 0.01         |
| SPAD1                | 45.85 ±0.32          | 20.50        | 45.88 ±0.42          | 20.69         | 0.94               | 0.08         |
| SPAD2                | 41.2 ±0.35           | 20.34        | 42.29 ±0.53          | 23.36         | 0.06*              | 2.67         |
| <i>g<sub>s</sub></i> | 596.39 ±6.99         | 32.84        | 591.92 ±8.63         | 31.41         | 0.67               | -0.75        |
| <b>2014</b>          |                      |              |                      |               |                    |              |
| HT                   | 3.16 ±0.02           | 21.62        | 3.1 ±0.03            | 22.51         | 0.25               | -1.84        |
| STNo                 | 22.14 ±0.39          | 52.00        | 21.55 ±0.53          | 56.01         | 0.39               | -2.67        |
| SDIA                 | 239.42 ±5.13         | 63.58        | 172.35 ±4.69         | 62.12         | 0.07*              | -28.01       |
| SA                   | 20.96 ±0.47          | 66.45        | 21.19 ±0.62          | 66.52         | 0.78               | 1.07         |
| <b>ILEN</b>          | <b>13.59 ±0.24</b>   | <b>42.07</b> | <b>12.98 ±0.28</b>   | <b>40.60</b>  | <b>0.05**</b>      | <b>-4.45</b> |
| YLD                  | 2.71 ±0.06           | 69.25        | 2.79 ±0.08           | 67.81         | 0.56               | 2.81         |
| <b>LFL</b>           | <b>6.6 ±0.06</b>     | <b>28.18</b> | <b>6.92 ±0.07</b>    | <b>24.54</b>  | <b>&lt;0.01***</b> | <b>4.88</b>  |
| <b>LFW</b>           | <b>1.81 ±0.06</b>    | <b>96.01</b> | <b>2.03 ±0.11</b>    | <b>118.12</b> | <b>0.05**</b>      | <b>12.22</b> |
| <b>LFA</b>           | <b>8.72 ±0.14</b>    | <b>46.06</b> | <b>9.49 ±0.17</b>    | <b>41.80</b>  | <b>&lt;0.01***</b> | <b>8.76</b>  |
| <b>LFP</b>           | <b>17.51 ±0.3</b>    | <b>51.03</b> | <b>18.38 ±0.37</b>   | <b>45.54</b>  | <b>0.04**</b>      | <b>4.97</b>  |
| <b>LFDW</b>          | <b>0.09 ±0.001</b>   | <b>40.16</b> | <b>0.11 ±0.002</b>   | <b>40.04</b>  | <b>&lt;0.01***</b> | <b>12.17</b> |
| SLA                  | 92.28 ±0.75          | 24.10        | 90.56 ±0.75          | 19.03         | 0.15               | -1.86        |
| <b>CDIA</b>          | <b>29.09 ±0.5</b>    | <b>50.60</b> | <b>31.42 ±0.74</b>   | <b>53.59</b>  | <b>0.01***</b>     | <b>8.01</b>  |
| <b>FORM</b>          | <b>49.36 ±0.46</b>   | <b>27.69</b> | <b>47.61 ±0.64</b>   | <b>30.84</b>  | <b>0.03**</b>      | <b>-3.55</b> |
| HCL                  | 17.69 ±0.03          | 4.36         | 17.79 ±0.04          | 4.34          | 0.09*              | 0.55         |
| CLS                  | 41.61 ±0.07          | 4.22         | 41.48 ±0.09          | 4.26          | 0.33               | -0.32        |



|              |                     |              |                     |              |                    |               |
|--------------|---------------------|--------------|---------------------|--------------|--------------------|---------------|
| LIG          | 27.29 ±0.05         | 4.42         | 27.36 ±0.06         | 4.37         | 0.42               | 0.26          |
| ASH          | 1.55 ±0.02          | 24.89        | 1.58 ±0.02          | 25.22        | 0.34               | 1.84          |
| SPGR         | 0.49 ±0.002         | 9.91         | 0.49 ±0.002         | 7.82         | 0.85               | -0.14         |
| <b>SPAD1</b> | <b>44.93 ±0.24</b>  | <b>12.84</b> | <b>46.15 ±0.33</b>  | <b>13.29</b> | <b>&lt;0.01***</b> | <b>2.73</b>   |
| <b>SPAD2</b> | <b>42.45 ±0.28</b>  | <b>18.35</b> | <b>43.72 ±0.36</b>  | <b>17.66</b> | <b>&lt;0.01***</b> | <b>2.99</b>   |
| $g_s$        | 474.51 ±5.7         | 35.66        | 483.68 ±7.18        | 33.88        | 0.39               | 1.93          |
| <b>VPHE</b>  | <b>110.54 ±0.14</b> | <b>3.12</b>  | <b>108.88 ±0.21</b> | <b>3.64</b>  | <b>&lt;0.01***</b> | <b>-1.51</b>  |
| <b>FPHE</b>  | <b>95.25 ±0.55</b>  | <b>13.95</b> | <b>86.98 ±0.85</b>  | <b>18.25</b> | <b>&lt;0.01***</b> | <b>-8.69</b>  |
| <b>2015</b>  |                     |              |                     |              |                    |               |
| <b>RUST</b>  | <b>28.33±0.53</b>   | <b>43.70</b> | <b>25.45±0.72</b>   | <b>50.49</b> | <b>0.01***</b>     | <b>-10.17</b> |

All values are mean ± SE across three locations except for RUST which was evaluated across two locations.

Two-tailed Mann-Whitney  $U$ -test ( $df=1$ ) results, where significant values ( $P<0.05$ ) are denoted by bold font.

Additional levels significance are also shown denoted by  $P<0.1$  (\*),  $P<0.05$  (\*\*), and bold font,  $P<0.01$  (\*\*\*)

Positive values for dimorphism denote male-biased difference and negative values denote female-biased difference.

**Table 5** Comparison of phenotypic traits for male and female individuals in an intraspecific F<sub>1</sub> *S. purpurea* family (n=100) and a F<sub>2</sub> *S. purpurea* family (n=482) measured in 2015 in Geneva, NY.

| Trait | F <sub>1</sub> <i>S. purpurea</i> family |              |                   |              |                 |              | F <sub>2</sub> <i>S. purpurea</i> family |              |                    |              |                 |              |
|-------|------------------------------------------|--------------|-------------------|--------------|-----------------|--------------|------------------------------------------|--------------|--------------------|--------------|-----------------|--------------|
|       | Female (n=70)                            |              | Male (n=30)       |              | P               | Diff (%)     | Female (n=266)                           |              | Male (n=216)       |              | P               | Diff (%)     |
|       | Mean ±SE                                 | CV           | Mean ±SE          | CV           |                 |              | Mean ±SE                                 | CV           | Mean ±SE           | CV           |                 |              |
| HT    | <b>3.24 ±0.22</b>                        | <b>11.42</b> | <b>3.29 ±0.34</b> | <b>10.94</b> | <b>0.02</b>     | <b>1.54</b>  | <b>3.11 ±1.15</b>                        | <b>12.22</b> | <b>3.13 ±1.35</b>  | <b>12.78</b> | <b>0.02</b>     | <b>0.64</b>  |
| STNo  | <b>21.2 ±0.4</b>                         | <b>33.33</b> | <b>23.3 ±0.53</b> | <b>26.09</b> | <b>0.03</b>     | <b>9.52</b>  | 18.4 ±0.21                               | 38.89        | 19.0 ±0.25         | 36.84        | 0.11            | 5.56         |
| SDIA  | <b>9.52 ±0.06</b>                        | <b>9.87</b>  | <b>9.26 ±0.09</b> | <b>10.91</b> | <b>&lt;0.01</b> | <b>-2.73</b> | 8.82 ±0.03                               | 9.75         | 8.81 ±0.03         | 10.67        | 0.43            | -0.11        |
| SA    | 16.8 ±0.34                               | 33.81        | 17.1 ±0.49        | 31.05        | 0.22            | 1.79         | 12.4 ±0.16                               | 41.69        | 12.9 ±0.19         | 43.64        | 0.12            | 4.03         |
| LFL   | 9.84 ±0.07                               | 11.99        | 9.83 ±0.12        | 12.82        | 0.85            | -0.10        | <b>9.19 ±0.04</b>                        | <b>13.38</b> | <b>9.09 ±0.04</b>  | <b>14.52</b> | <b>0.03</b>     | <b>-1.09</b> |
| LFW   | 2.19 ±0.02                               | 15.98        | 2.16 ±0.04        | 18.98        | 0.32            | -1.37        | 2.05 ±0.01                               | 21.95        | 2.04 ±0.02         | 27.94        | 0.13            | -0.49        |
| LFA   | 17.2 ±0.23                               | 22.33        | 17.1 ±0.4         | 25.26        | 0.56            | -0.58        | 15.1 ±0.11                               | 23.71        | 14.8 ±0.12         | 24.73        | 0.07            | -1.99        |
| LFP   | 22.2 ±0.33                               | 24.86        | 22.7 ±0.53        | 25.07        | 0.51            | 2.25         | <b>21.1 ±0.16</b>                        | <b>25.21</b> | <b>20.8 ±0.18</b>  | <b>26.11</b> | <b>0.02</b>     | <b>-1.42</b> |
| LFDW  | 0.13±0.002                               | 23.08        | 0.13±0.003        | 30.77        | 0.82            | 0.00         | <b>0.12 ±0.000</b>                       | <b>25.00</b> | <b>0.11 ±0.001</b> | <b>27.27</b> | <b>&lt;0.01</b> | <b>-8.33</b> |
| SLA   | 133 ±1.02                                | 12.84        | 132 ±1.58         | 12.82        | 0.58            | -0.75        | <b>131 ±0.56</b>                         | <b>13.89</b> | <b>134 ±0.59</b>   | <b>13.04</b> | <b>&lt;0.01</b> | <b>2.26</b>  |
| CDIA  | <b>36.3 ±0.49</b>                        | <b>22.59</b> | <b>38.7 ±0.88</b> | <b>24.44</b> | <b>0.02</b>     | <b>6.61</b>  | <b>30.6 ±0.24</b>                        | <b>25.23</b> | <b>32.1 ±0.3</b>   | <b>27.32</b> | <b>&lt;0.01</b> | <b>4.90</b>  |
| FORM  | <b>40.9 ±0.38</b>                        | <b>15.45</b> | <b>39.1 ±0.6</b>  | <b>16.47</b> | <b>0.02</b>     | <b>-4.40</b> | <b>45.8 ±0.22</b>                        | <b>16.05</b> | <b>44.6 ±0.27</b>  | <b>17.96</b> | <b>&lt;0.01</b> | <b>-2.62</b> |
| SPAD1 | 56.2 ±0.3                                | 8.52         | 54.9 ±0.68        | 12.28        | 0.11            | -2.31        | 57.2 ±0.19                               | 10.05        | 57.1 ±0.19         | 8.88         | 0.88            | -0.17        |
| RGB   | 112 ±0.94                                | 14.11        | 111 ±1.42         | 13.78        | 0.38            | -0.89        | 111 ±0.49                                | 14.50        | 112 ±0.55          | 14.46        | 0.08            | 0.90         |
| SRV   | 99.6 ±0.26                               | 4.44         | 99.7 ±0.29        | 3.10         | 0.87            | 0.10         | 99.34 ±0.17                              | 5.51         | 98.8 ±0.25         | 7.43         | 0.05            | -0.54        |
| RUST  | -                                        | -            | -                 | -            | -               | -            | <b>7.9 ±0.002</b>                        | <b>88.61</b> | <b>8.8 ±0.003</b>  | <b>90.91</b> | <b>0.03</b>     | <b>11.39</b> |

Values are mean ± SE.

Two-tailed Mann-Whitney *U*-test (d.f.=1) results, where significant values ( $P<0.05$ ) are denoted by bold font.

Positive values for dimorphism denote male-biased difference and negative values denote female-biased difference.

1

**Table 6** Mixed model test for nitrogen utilization.

| <b>Source</b>        | <b>DF</b> | <b>F Ratio</b> | <b>Pr &gt; F</b>  |
|----------------------|-----------|----------------|-------------------|
| Location             | 2         | 65.26          | < <b>0.0001</b> * |
| Treatment            | 1         | 170.00         | < <b>0.0001</b> * |
| Sex                  | 1         | 15.75          | <b>0.0001</b> *   |
| Sex × Treatment      | 1         | 0.31           | 0.58              |
| Location × Treatment | 2         | 6.51           | < <b>0.01</b> *   |

\*Significantly different at  $P < 0.05$

2

1 **SUPPORTING INFORMATION**

2 **Appendix S1.** Clone ID, sex, and source information for 78 genotypes in the diversity panel.

3 **Appendix S2.** Experimental site characteristics for all trial locations.

4 **Appendix S3.** Materials and methods detailing genotyping, phenotypic and statistical analysis  
5 for *Salix purpurea*.

6 **Appendix S4.** Summary of phenotypic traits from the *Salix purpurea* diversity panel.

7 **Appendix S5.** Parameter estimates and significance values for multiple linear regression  
8 predictors of second year yield.

9 **Appendix S6.** Matrix of all pair-wise comparisons between traits by location within each year.

10 The lower diagonal shows a scatter plot matrix with a LOESS smooth curve fitting, the main  
11 diagonal is a histogram showing the distribution of each trait, and the upper diagonal indicating  
12 the Pearson correlation coefficient ( $r$ ) and  $P$ -value for each comparison. Locations: (A) Geneva,  
13 NY 2013 (B) Portland, NY 2013, (C) Morgantown, WV 2013, (D) Geneva, NY 2014, (E)  
14 Portland, NY 2014, and (F) Morgantown, WV 2014.

15 **Appendix S7.** Matrix of all pair-wise comparisons between traits measured in 2015 for the *Salix*  
16 *purpurea* F<sub>1</sub> population.

17 **Appendix S8.** Matrix of all pair-wise comparisons between traits measured in 2015 for the *Salix*  
18 *purpurea* F<sub>2</sub> population.

19 **Appendix S9** Correlation heatmap showing Pearson's correlation coefficients ( $r$ ) for all *Salix*  
20 *purpurea* accessions (n=78). Traits shown are divided by category as listed in Table 1. Colored  
21 boxes indicate significant correlations at  $P < 0.05$ , where correlation coefficients of 1 are indicated  
22 by dark red and -1 shown as dark blue. All pair-wise comparisons between traits by year and  
23 location are shown in Appendix S6. Years: (A) 2013 and (B) 2014.

- 1 **Appendix S10.** Multiple linear regression model for estimating second year post-coppice
- 2 biomass yield from annual measurements.
- 3

1 **FIGURE LEGENDS**

2

3 **Figure 1.** Box plots of biomass and morphological traits that were significantly different  
4 ( $P < 0.05$ ) between females (grey boxes) and males (blue boxes). (A) Second year, first rotation  
5 biomass yield from the diversity panel measured across three field trials. (B) First year,  
6 significantly different traits from the diversity panel. (C) Second year, significantly different  
7 traits from the diversity panel. (D) Significantly different traits from  $F_1$  population. (E)  
8 Significantly different traits from  $F_2$  population.

9

10 **Figure 2.** SPAD values for monitoring nitrogen utilization in *Salix purpurea* diversity panel.  
11 Box plots representing females are colored in green and males colored in blue. SPAD values for  
12 control and fertilized plots for (A) Geneva, NY ( $F_{1,105} = 15.73$ ,  $P < 0.01$ ), (B) Portland, NY  
13 ( $F_{1,105} = 3.44$ ,  $P = 0.06$ ), and (C) Morgantown, WV ( $F_{1,105} = 5.96$ ,  $P = 0.02$ ).

14

15 **Figure 3.** Least square means for leaf rust severity scores of female and male *Salix purpurea*.  
16 (A) Rust severity scores and standard errors on females and males of the diversity panel at the  
17 Geneva, NY and Portland, NY field sites. (B) Rust severity scores and standard error on  $F_1$ ,  $F_2$   
18 parents and female and male  $F_2$  progeny in Geneva, NY. Significant differences between females  
19 and males within each site and population are denoted by \*  $P < 0.10$ , and \*\*  $P < 0.01$ , where n.s.  
20 denotes no significant difference.

21

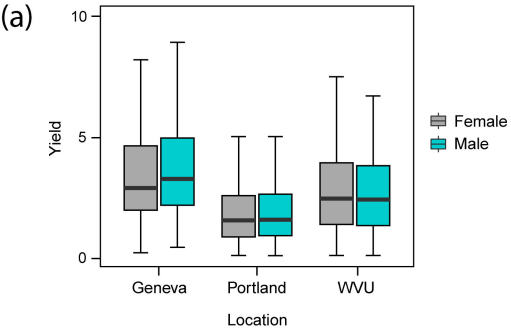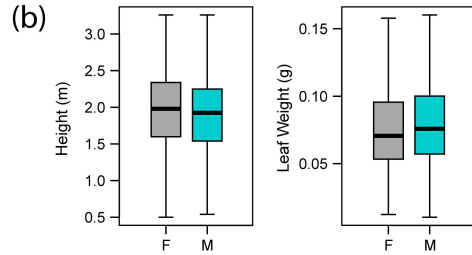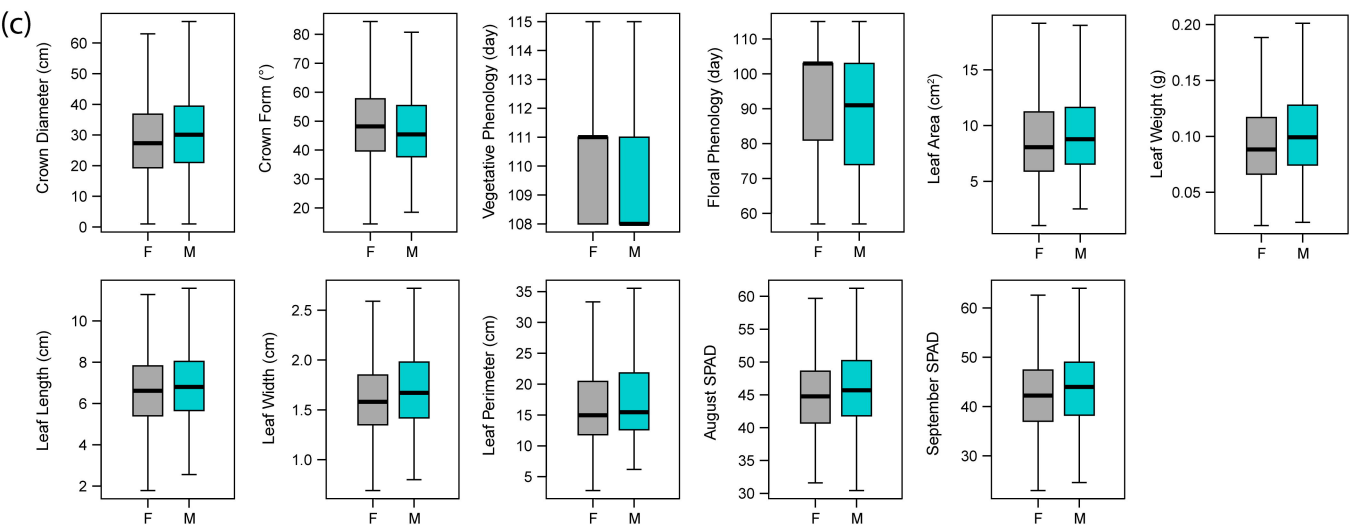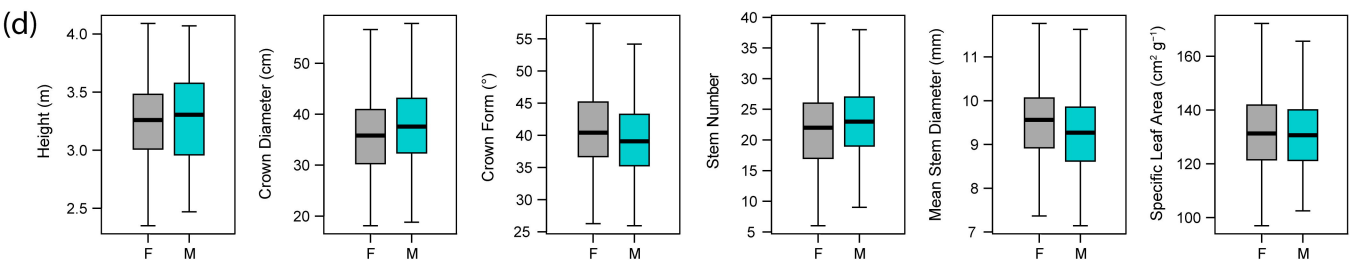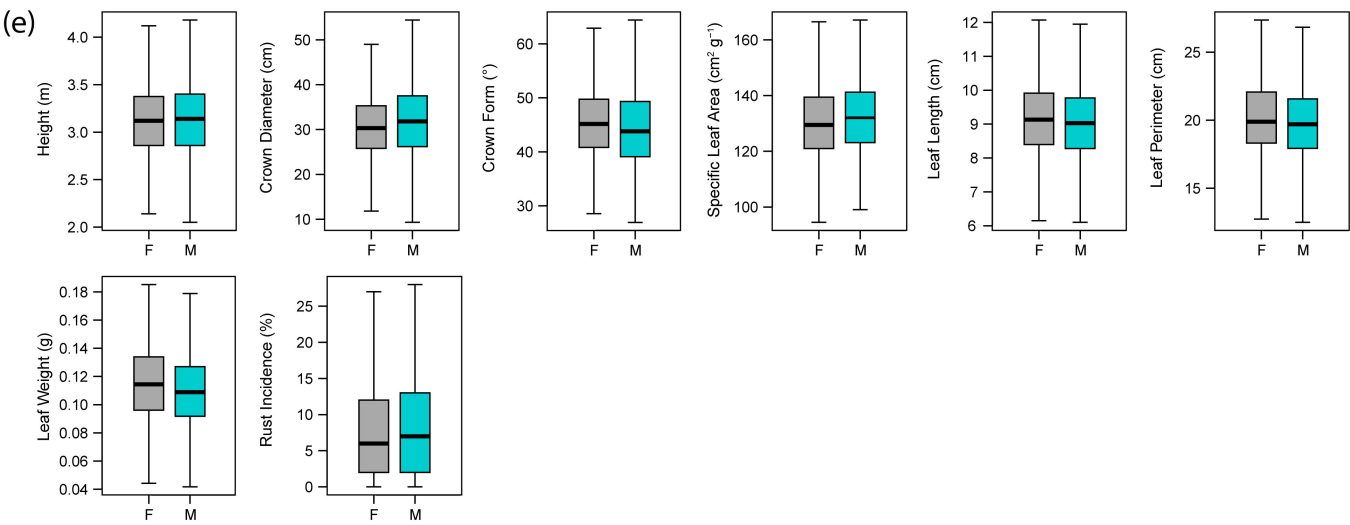

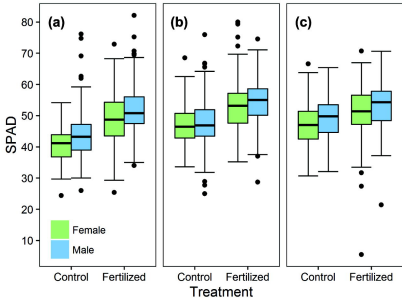



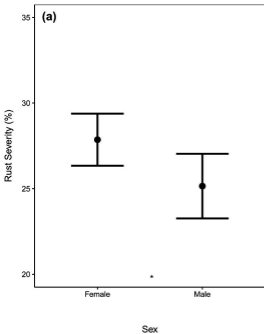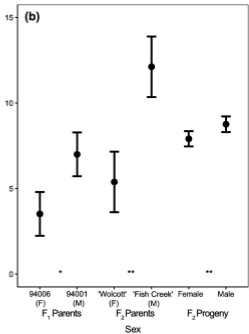

Source: https://www.biorxiv.org/content/10.1101/2020.04.05.026427v1.full.pdf
